# Supplementary material for: Elevated FAM134B expression induces radiation-sensitive in hepatocellular carcinoma
Source: Springer Nature journal article supplement (doi:10.1186/s12885-023-11030-x), 2023-07-17

Figure 1

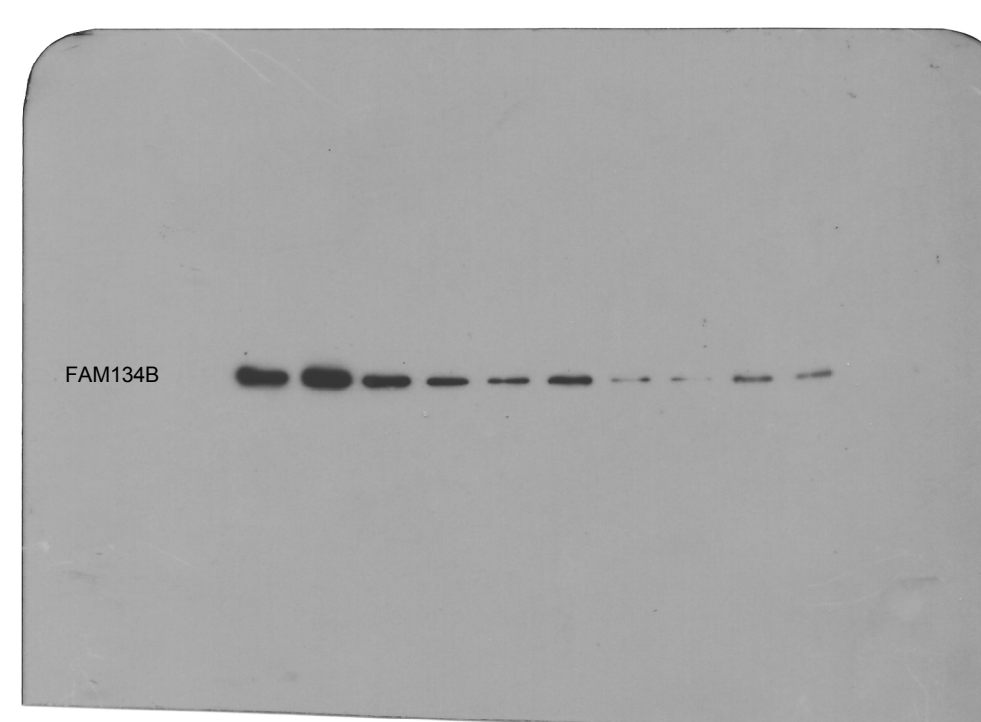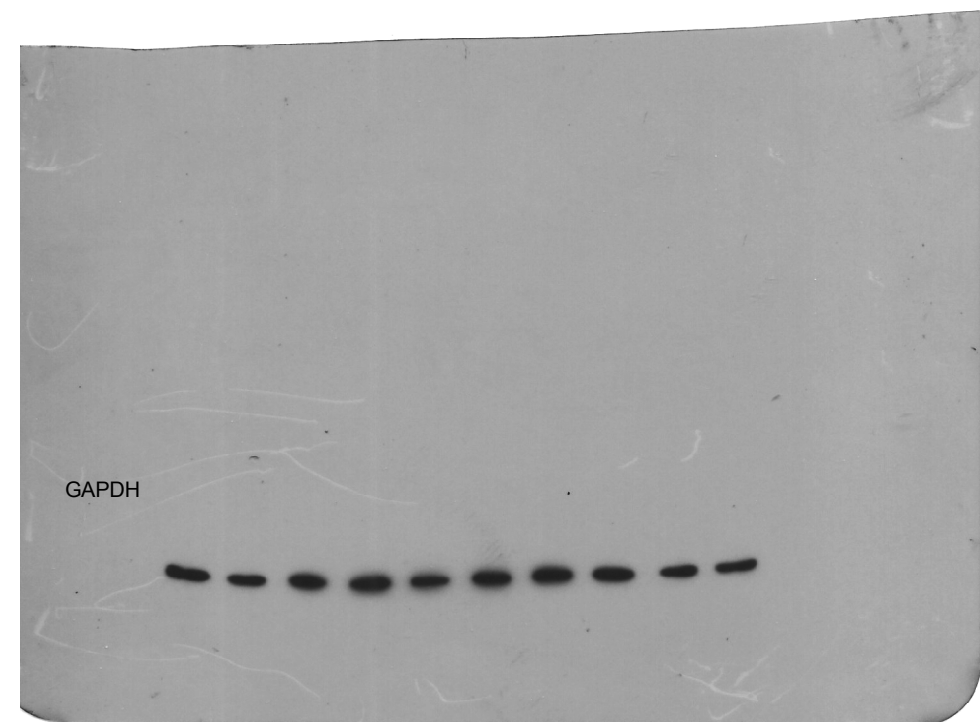

Figure 3

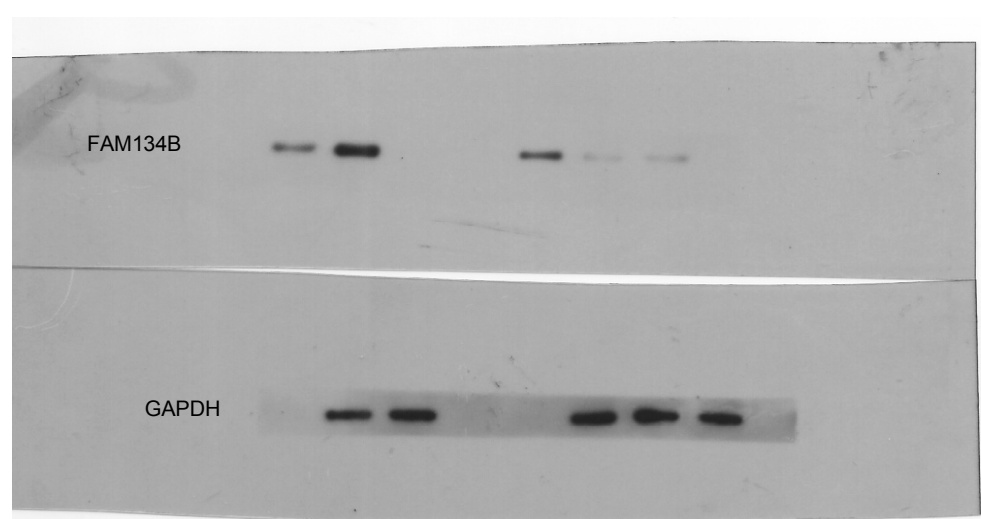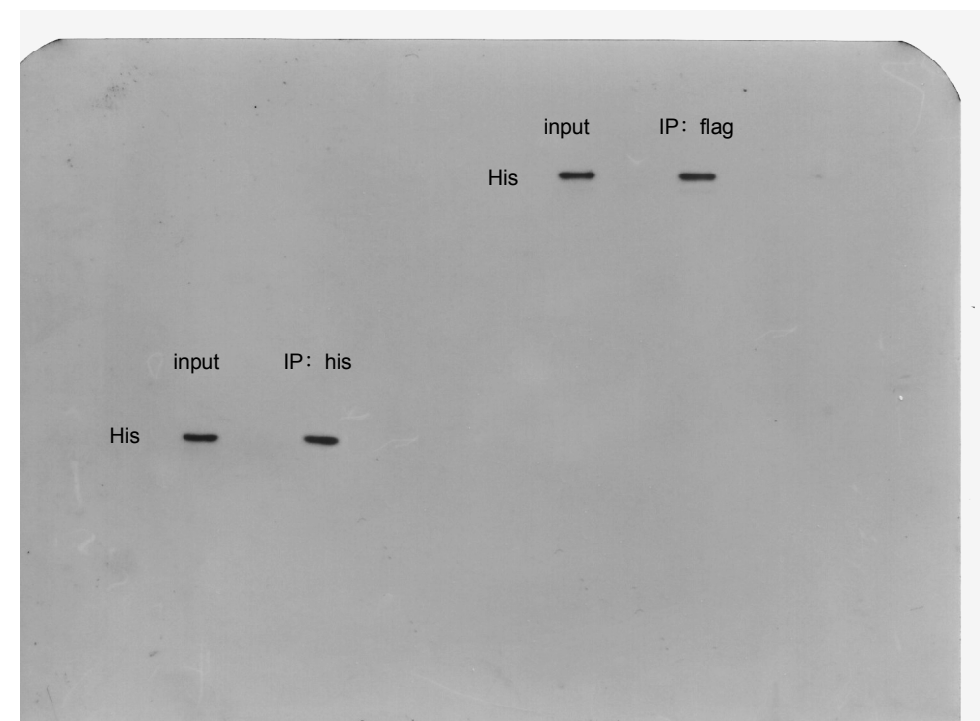

Figure 5

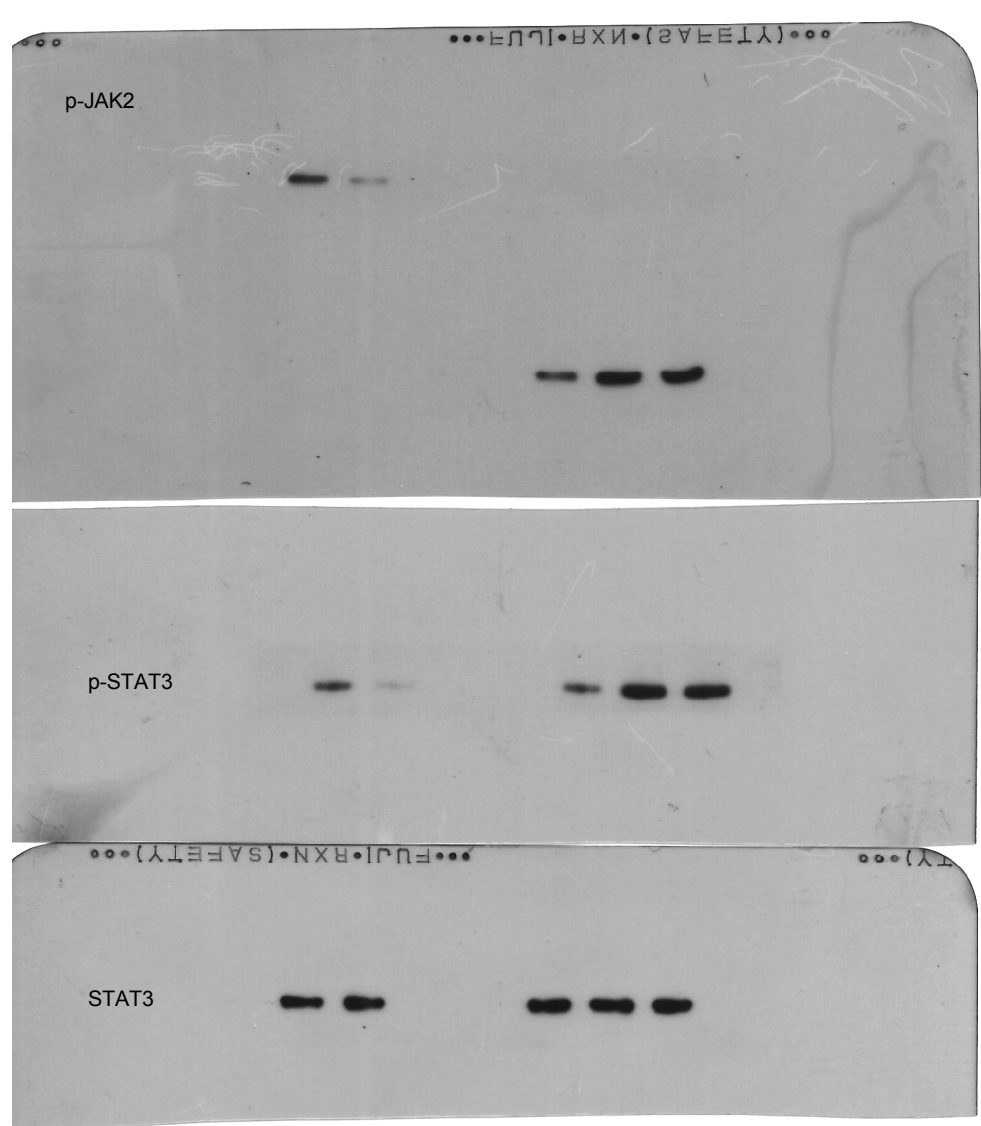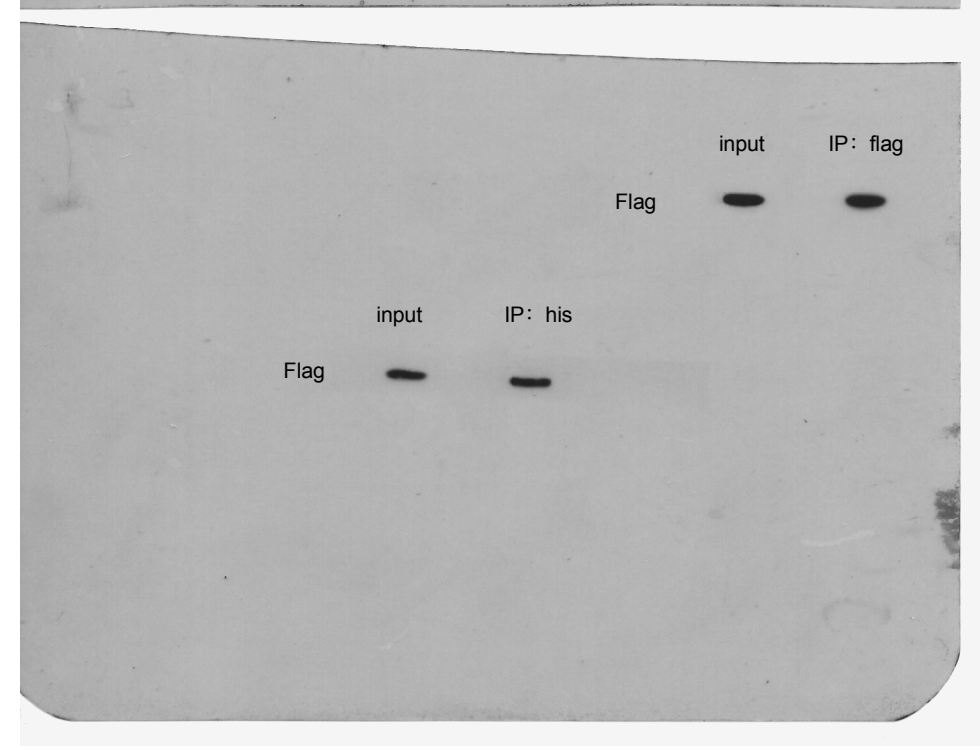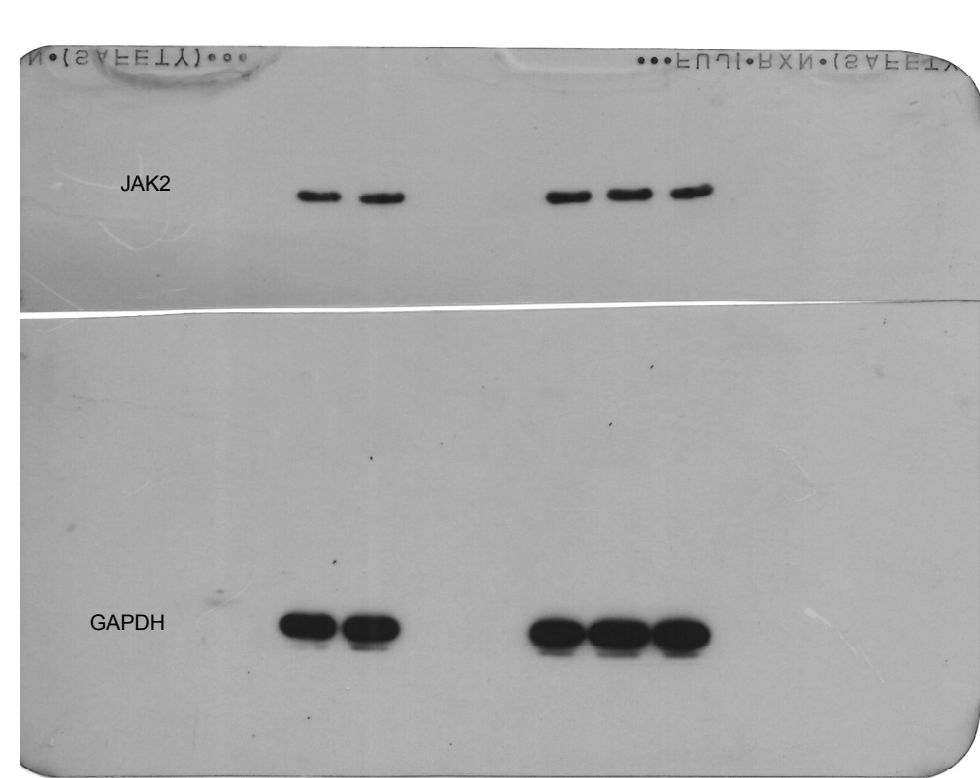

Figure 6

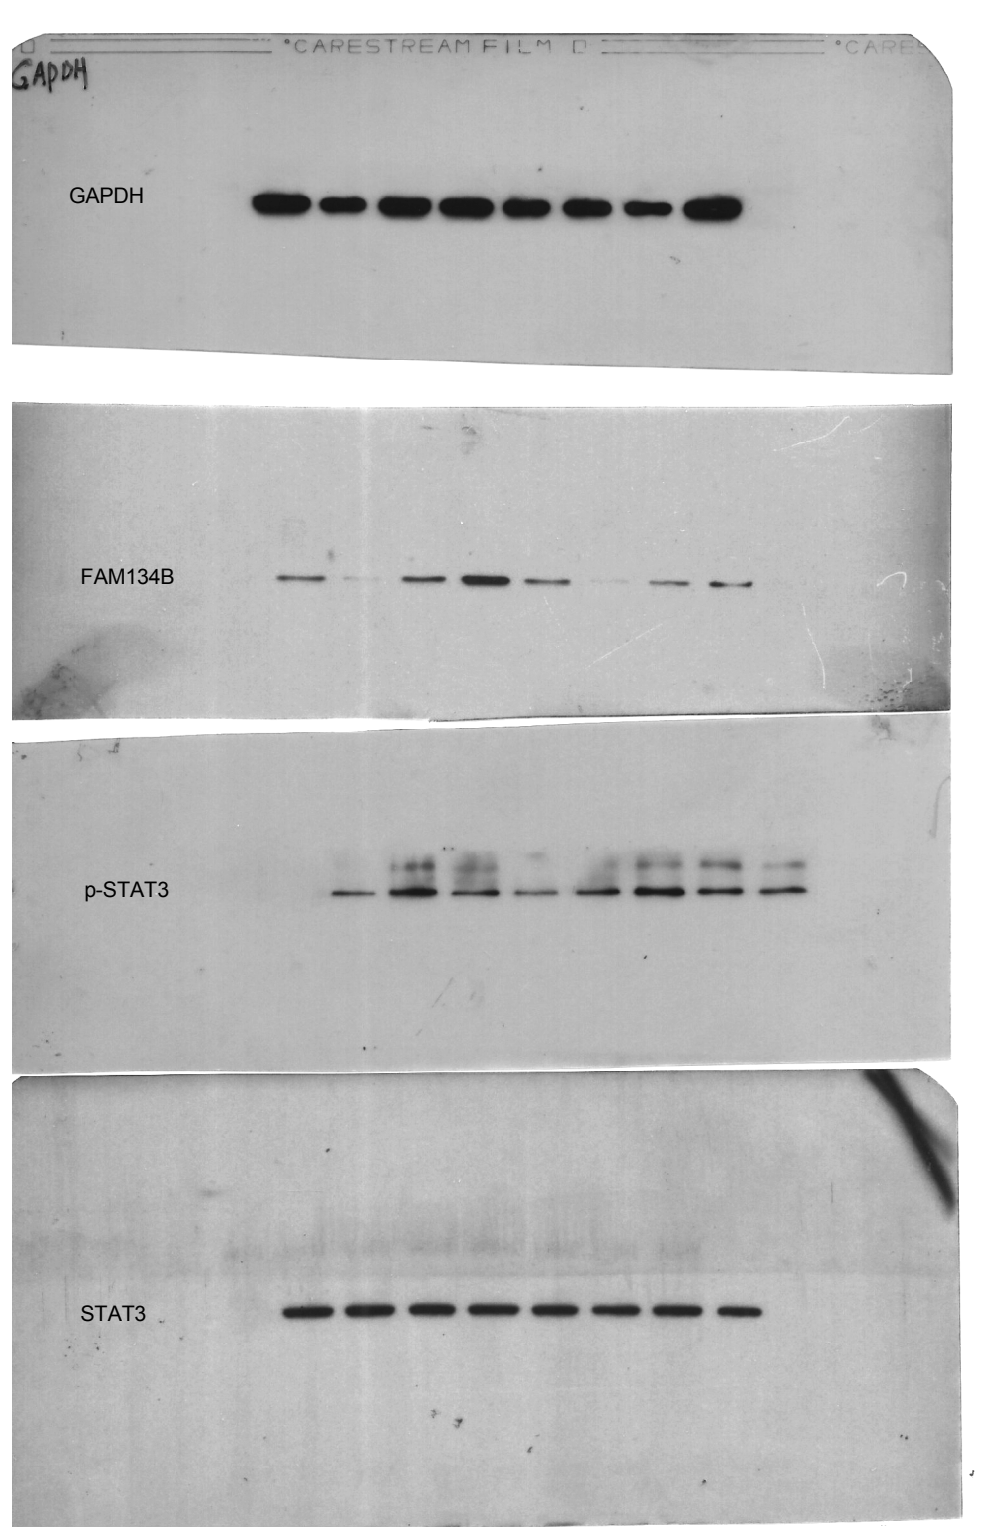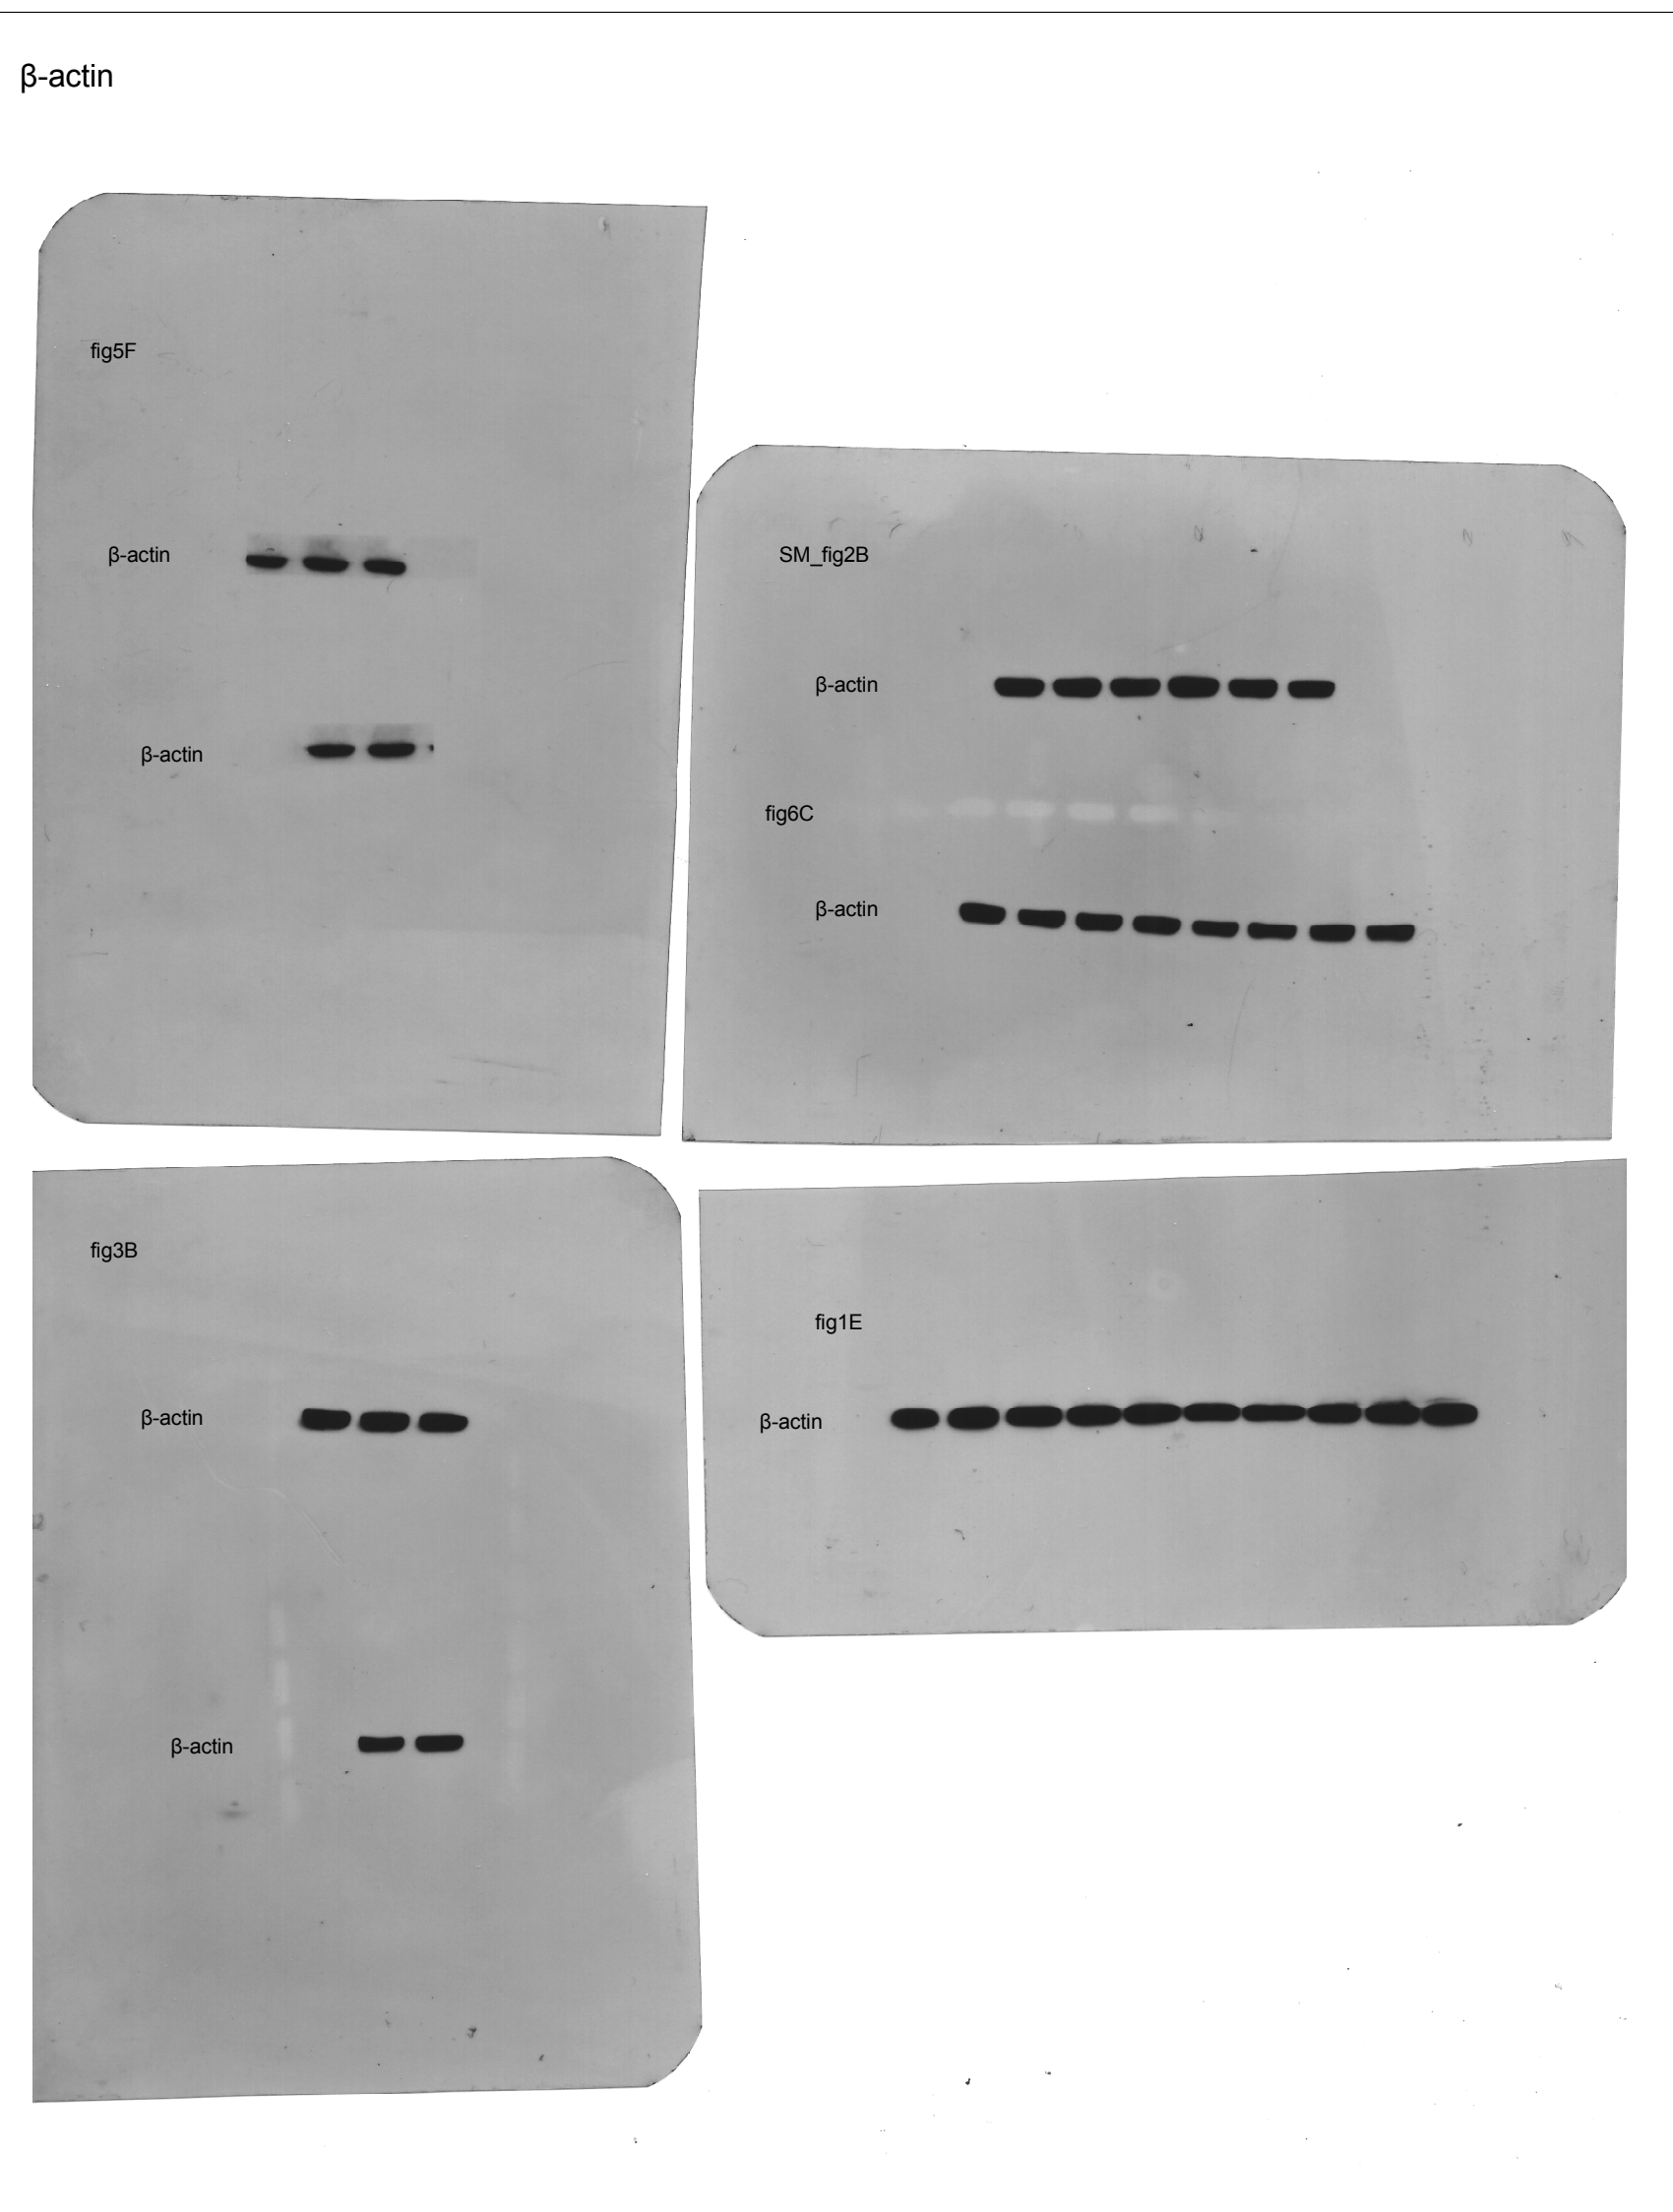

SM Figure 2

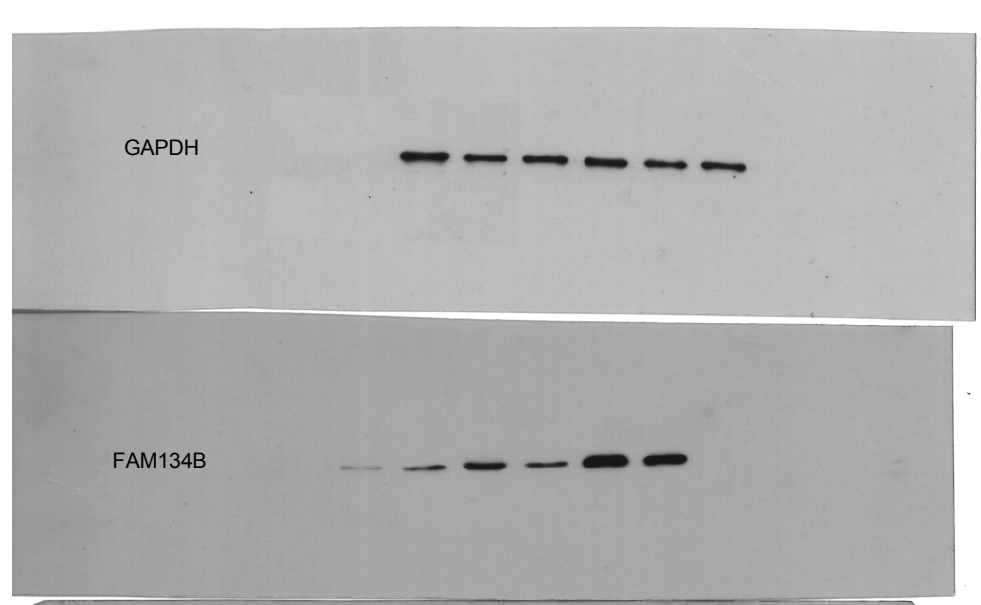

Supplement: MOESM1 [file 25809114]
