# Supplementary material for: Elevated FAM134B expression induces radiation-sensitive in hepatocellular carcinoma
Source: Springer Nature journal article supplement (doi:10.1186/s12885-023-11030-x), 2023-07-17
Supplement: MOESM3 [file 25809114]

Supplemental

SM Figure 1

A

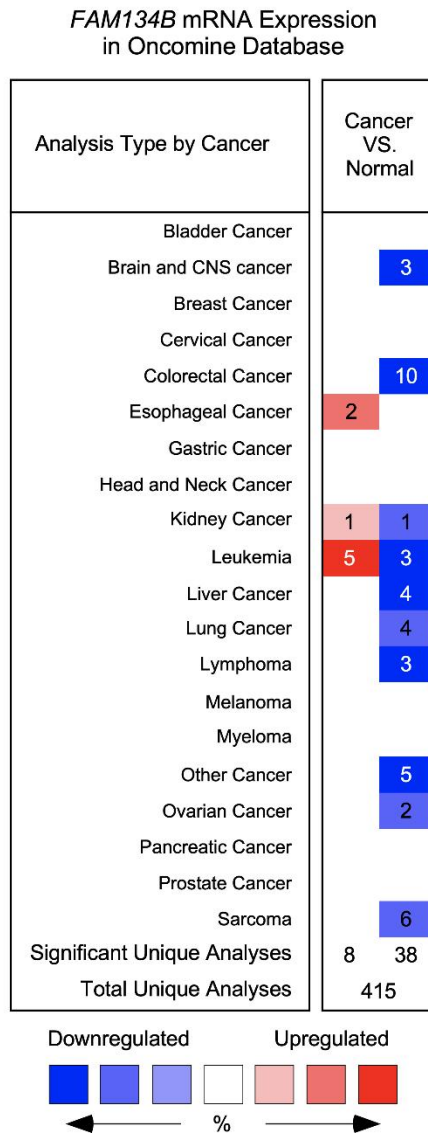

B

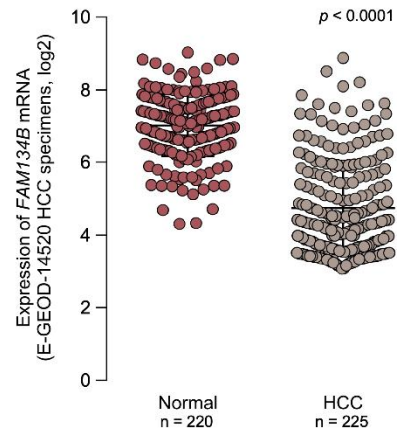

figure

**Supplemental Figure 1 A.** mRNA expression of *FAM134B* in Oncomine database in multiple cancers. **B.** Downregulated *FAM134B* in primary HCC tissues (Tumor) compared with normal tissue (Normal) (n = 445, E-GEOD-14520).

## SM Figure 2

A

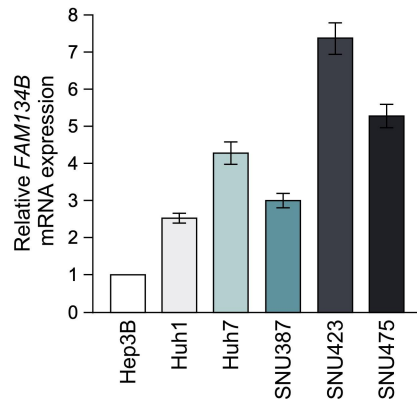

B

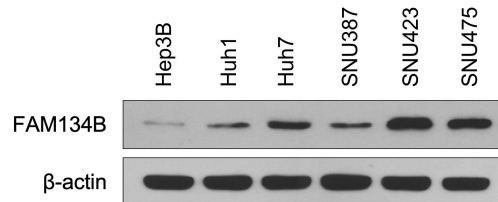

**Supplemental Figure 2 A.** Real-time PCR analysis of FAM134B expression in 6 HCC cell lines. **B.** Western blotting analysis of FAM134B expression in 6 HCC cell lines.  $\beta$ -actin was used as a loading control. Each bar represents the mean  $\pm$  SD of three independent experiments.
